# Supplementary material for: One-pot synthesis of bimetallic PdCu nanoframes as an efficient catalyst for the methanol oxidation reaction
Source: Royal Society of Chemistry journal article supplement (doi:10.1039/c7nj04214k), 2017-11-28
Supplement: c7nj04214k1.pdf [file c7nj04214k1.pdf]

Supporting Information for New Journal of Chemistry

**One-Pot Synthesis of Bimetallic PdCu Nanoframes as Efficient Catalyst  
for Methanol Oxidation Reaction**

Chao Li,<sup>a‡</sup> Kamel Eid,<sup>b‡</sup> Hongjing Wang,<sup>b\*</sup> Yaoyao Deng,<sup>a</sup> Shuanglong Lu,<sup>a</sup> Xiaonian Li,<sup>b</sup>  
Liang Wang,<sup>b\*</sup> and Hongwei Gu<sup>a\*</sup>

<sup>a</sup> Key Laboratory of Organic Synthesis of Jiangsu Province, College of Chemistry, Chemical Engineering and Materials Science & Collaborative Innovation Centre of Suzhou Nano Science and Technology, Soochow University, Suzhou 215123, P.R. China. E-mail: hongwei@suda.edu.cn

<sup>b</sup> College of Chemical Engineering, Zhejiang University of Technology, Hangzhou, Zhejiang 310014, P.R. China. E-mail: hjw@zjut.edu.cn, wangliang@zjut.edu.cn

<sup>‡</sup> Chao Li and Kamel Eid contributed equally to the work.

**1. Experimental Section**

**1.1. Chemicals and Materials**

Oleylamine (Acros, 80%-90%), palladium acetylacetonate ( $\text{Pd}(\text{C}_5\text{H}_7\text{O}_2)_2$ , 98 %), copper acetylacetonate ( $\text{Cu}(\text{C}_5\text{H}_7\text{O}_2)_2$ , 98%), and hexane (99.5%) were purchased from Tokyo Chemical Industry Co., Ltd, Shanghai. Chloroform ( $\geq 99\%$ ) and ethanol ( $\geq 99.5\%$ ) were purchased from Sinopharm Chemical Reagent Co. Ltd. Commercial Pt/C catalyst E-TEK Pt/C (20 wt % Pt nanoparticles 2-5 nm on Vulcan XC-72R carbon support) was purchased from Alfa Aesar. All the chemicals were of analytical grade and used as received without further purification.

**1.2. Synthesis of mesoporous PdCu NFs**

PdCu NFs are prepared by a one-pot solvothermal method. In a typical synthesis, 0.08 mmol  $\text{Pd}(\text{acac})_2$ , 0.12 mmol  $\text{Cu}(\text{acac})_2$  and 10 ml oleylamine are mixed under stirring at 100 °C under  $\text{N}_2$  for 30 min. After cooling to room temperature, the mixture is transferred into an autoclave, and then charged with  $\text{NH}_3$  at 5 bar. The autoclave is heated to 165 °C for 4 h under stirring. The resulting black colloidal product is collected by centrifugation and washed several times with ethanol and chloroform.

### 1.3. Materials Characterization

The morphology of the PdCu NFs is observed by a transmission electron microscopy (TEM) (TecnaiG220, FEI, American) equipped with a Gatan CCD794 camera operated at 200 kV. The high-angle annular dark-field scanning transmission electron microscopy (HAADF-STEM), elemental mapping, high-resolution TEM (HRTEM) and Energy dispersive X-ray (EDX) and EDX line-scan are carried out on a Tecani G2 F20 TEM with an accelerating voltage of 200 KV. Mo TEM grid is used. The powder wide-angle X-ray diffraction pattern (XRD) is recorded on a X'Pert-Pro MPD diffractometer (Netherlands PANalytical) with a Cu K $\alpha$  X-ray source ( $\lambda = 1.540598 \text{ \AA}$ ).

### 1.4. Methanol Oxidation Reaction

The electrocatalytic investigations are conducted using a CHI 842D electrochemical analyzer (Chenhua Co., Shanghai, China) using a conventional three-electrode cell including a Ag/AgCl (saturated KCl), Pt wire, and modified glassy carbon (GCE) as a reference, counter, and working electrode, respectively. The working electrodes are coated with the catalysts with the same loading amount of 10  $\mu\text{g}$ , flowed by addition of 3  $\mu\text{L}$  Nafion (0.05 %) and dried under vacuum at 80  $^{\circ}\text{C}$  before the electrochemical measurements.

Prior to the measurements, the working electrodes are cleaned via steady state cyclic voltammograms (CVs) scanned in a  $\text{N}_2$ -saturated 0.1 M  $\text{HClO}_4$  between -0.2 to 1.2 V. After that, the CVs are performed in a 0.1 M  $\text{N}_2$ -saturated  $\text{HClO}_4$  at a scan rate of 50  $\text{mV s}^{-1}$  without and with 1 M methanol to measure the electroactive surface areas (ECSAs) and MOR, respectively. The ECSAs are calculated by the following equation:  $\text{ECSA} = Q_{\text{H}} / m \times 210$ , where  $Q_{\text{H}}$  is the charge for  $\text{H}_{\text{upd}}$  adsorption determined using  $Q_{\text{H}} = 0.5 \times Q$  (where  $Q$  is the charge in the  $\text{H}_{\text{upd}}$  adsorption–desorption area obtained after the double layer correction region between 0 and 0.37 V),  $m$  is the Pt loading amount on the working electrodes, and 210  $\mu\text{C cm}^{-2}$  is the charge required for the monolayer adsorption of hydrogen on the Pt surface.

The specific and mass activities are obtained by normalized the measured current densities in reference to the ECSAs and loading amount of Pt, respectively. The MOR durability tests are tested in a 0.1 M  $\text{N}_2$ -saturated  $\text{HClO}_4$  at a scan rate of 50  $\text{mV s}^{-1}$  containing 1 M methanol at 0.6 V with cycles from 0 to 2,000 at room temperature.

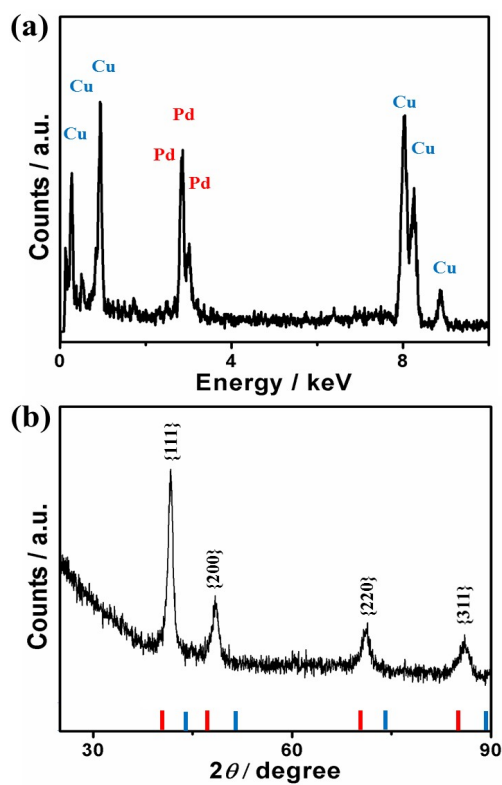

**Figure S1.** (a) EDX analysis and (b) wide-angle XRD pattern of PdCu NFs. The Pd and Cu peak positions are shown at the bottom.

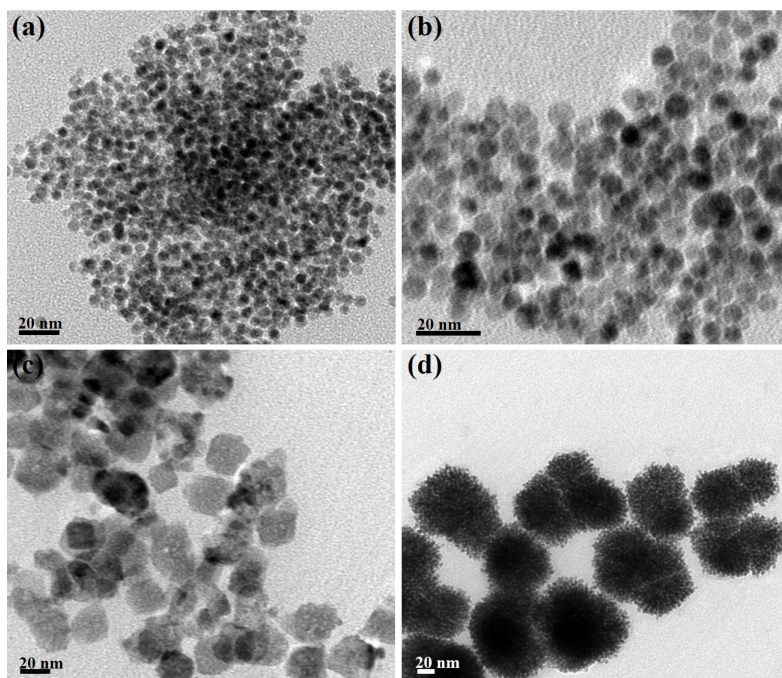

**Figure S2.** (a) TEM image of PdCu NCs prepared using  $N_2$  instead of  $NH_3$ , (b) PdCu NCs obtained using twice concentration of Pd and Cu precursors, (c) mono Cu NCs and (d) mono Pd NCs synthesized using  $NH_3$ .

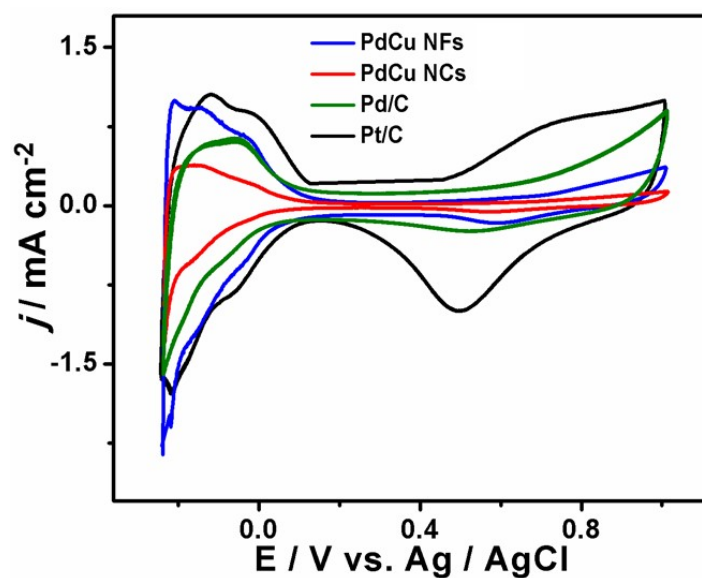

**Figure S3.** CVs of different catalysts measured in  $N_2$ -saturated 0.1 M  $HClO_4$  at a scan rate of  $50 \text{ mV s}^{-1}$ .

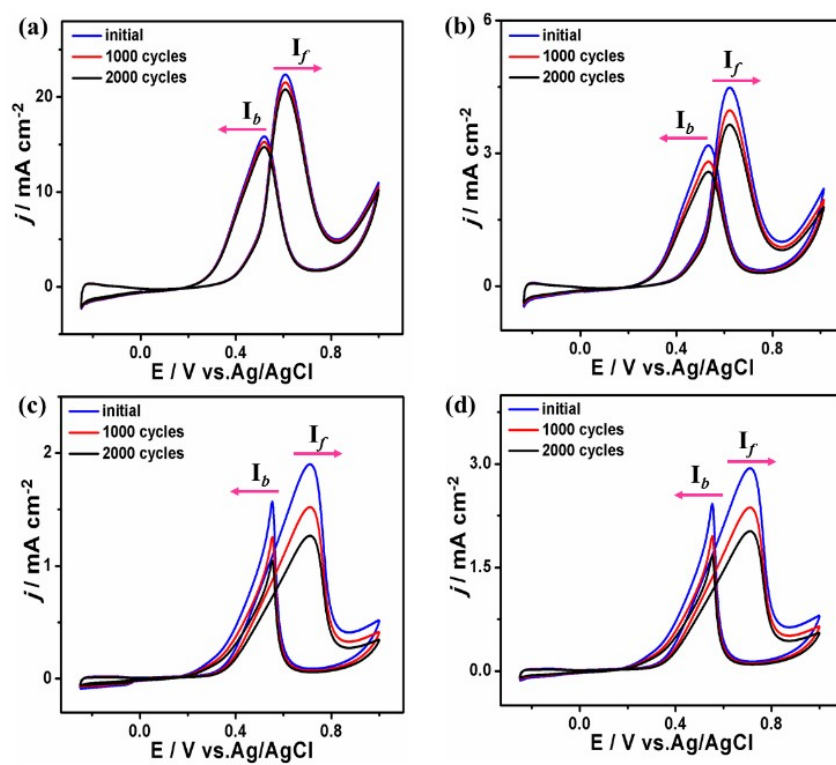

**Figure S4.** CVs for MOR durability on (a) PdCu NFs, (b) PdCu NCs, (c) Pd/C, and (d) Pt/C, respectively, in 0.1 M  $HClO_4$  with 1 M  $CH_3OH$  at a scan rate of  $50 \text{ mV s}^{-1}$ .

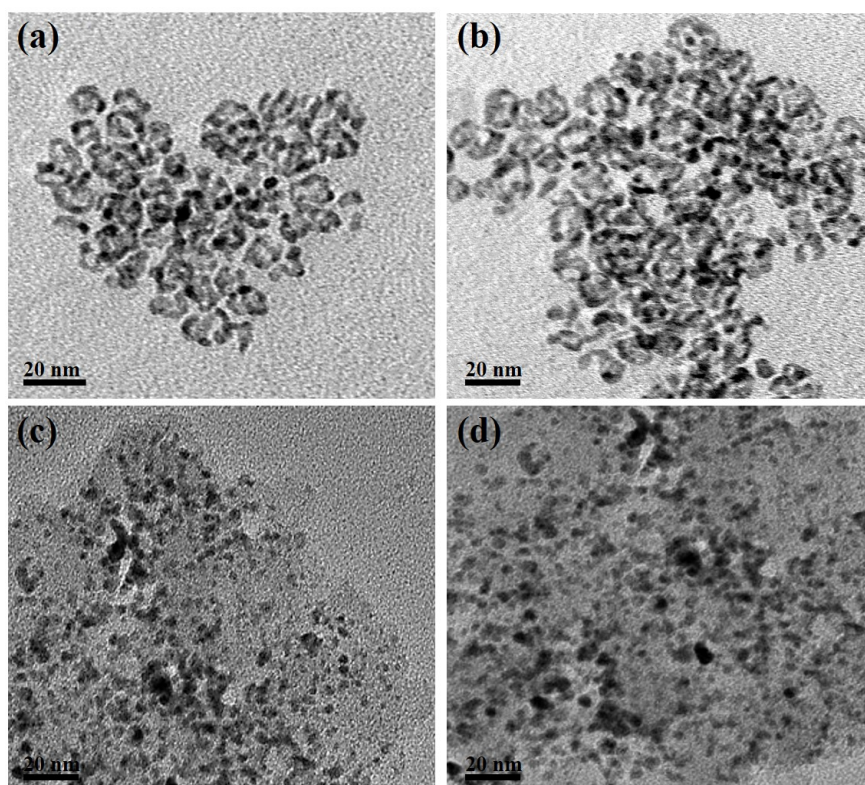

**Figure S5.** TEM images for (a and b) PdCu NFs and (c and d) commercial Pd/C catalyst before (a and c) and after (b and d) MOR durability test, respectively.
